# Supplementary material for: C/EBPα Is Required for Long-Term Self-Renewal and Lineage Priming of Hematopoietic Stem Cells and for the Maintenance of Epigenetic Configurations in Multipotent Progenitors
Source: PLoS Genet. 2014 Jan 9;10(1):e1004079. doi: 10.1371/journal.pgen.1004079 (PMC3886906; doi:10.1371/journal.pgen.1004079)
Supplement: Table S10 — Primer sets used for qPCR. (XLSX) [file pgen.1004079.s015.xlsx]

## Sheet: Sheet1
Gene expression analysis
Gene	Sequence F	Sequence R
Beta-actin	CTCTTCCAGCCTTCCTTCCT	TGCTAGGGCTGTGATCTCCT
Emilin2	CAGCGATGGAGGCGTTGTTC	TGCGGTGAAGATCCCAGTGT
CD48	GTATTTGATCCTGTGCCCAAGCC	TTTGGGGAAAGGTCCCGAGC
Id2	CCTGTCCTTGCAGGCATCTGA	CCATTCAACGTGTTCTCCTGGTG
E2f2	AAGCCCCAAAACCCCCAAGT	CATCCTCCGACTCGCTCAGG
Cebpa	TGAGAAAAATGAAGGGTGCAG	CGGG ATCTCAGCTTCCTGT
Klf12	TGGTGGTACAGTCAGTGCCG	CGGGGCTCCATTTGTGCTTT
Spred2	ACACACCCGGACGATGACAG	GCATGACCTTACACACGCCG
Ccnd2	AGAAGCTGTCCCTGATCCGC	TGGCAAACTTGAAGTCGGTAGC
ChIP
Gene	Sequence F	Sequence R
Sfi2 (H3K4me3, H3K27me3)	TGGGAGACATAACGATGGCAC	CCTCAGTGATGAGTGTGTGTAG
Mef2 (C/EBPa)	GGGACCAAAGCGATGCTCCT	CTGGGCTTCGGCCGTTCTC
Csf3r (C/EBPa)	TAGCTCACCAGTTTCCCTCA	GCAAGTTCCCGAAACTTCTC
Ptgs2 (C/EBPa)	CTCATTTGCGTGGGTAAAAGC	CCTCTCTGCTTCAGTGAGTTG
Emilin2 (C/EBPa)	CAGGAGCCAGAGAAAGGCTT	AGGCTAGGAAGTTGAGAACTG
Meis1 (C/EBPa)	AGAATGCTAGAACCCGGAAGTA	GTAAGACGCGACCTGTTATGG
Dab2ip (C/EBPa)	GCCTAGGATCGAAGTGAATCA	CAGCTTTACCCGCCCAGGATA
Sfpi1 intron (C/EBPa)	TTGAGTGGACCGGCTCTCAAG	GCTTCTCCCCACAACCACAGA
Sfpi1 enhancer (C/EBPa)	CTGGTGGCAAGAGCGTTTCTC	CACCACAGGAAGCATGTGTGC
Gas7 (C/EBPa)	CTCTGCTGGCTGCTGACTCA	CATGAATCAAGGCCCGAGTTG
Hoxa10 (H3K4me3, H3K27me3)	TCTGACTTGAGCCCTCGGTTG	AGCTGTCTCCAGCCCCTTCAG
Emilin2 (H3K4me3, H3K27me3)	ATGGGGCTCTCTCTGCTACCG	CCCAGATCCTAGGCGGTCACT
Mecom (H3K4me3, H3K27me3)	CTCTCTCCCCGTGCGCTAGAC	CAAAGGCAGGGCAAGGAAACT
Prkg1 (H3K4me3, H3K27me3)	GCTGCCTCAGCTCCTCGATCT	CAGGCTTGGCTTTGGTCTCAA
Phldb2 (H3K4me3)	GCCCACTCACCAGCTCATCTTT	GGGACCGGACTAGGACACAGG
Obsl1 (H3K4me3, H3K27me3)	CCAGCTTGAAGTGGCTGCTGT	GAGGAGGTGGTGCTGACGTG
Socs2 (H3K27me3)	AACCTGGTTCCACGCCCTAAA	CTCCGAGGCAGGGATGCAG
Cdc14b (H3K4me3)	GGCCCATCTCCGGTAAAGTTG	GCAGCAGGACGACCTGTACCT
Col4a1 (H3K4me3, H3K27me3)	CTGGCTCCTCGGTACCCTCAC	CGGGTCTCCCTCTCCTAGTCC
Col4a2(H3K4me3, H3K27me3)	GCTCCTGACCCTGAGGTGAGA	CTATTCCCCCAGCTCCGATCC
Dip2c (H3K4me3, H3K27me3)	GTCAGTGGACTTCGGGATTGG	CACAAACACGCCGGAACAATA
Dsg2 (H3K4me3, H3K27me3)	CGGGAACTGCCTCGTACCTC	GCCCGGGTCAGAAAGGGTAG
Fstl1 (H3K4me3, H3K27me3)	CTGGGAGGAGGGGGATGAAT	GCCAGCCATCGTTTCCACAT
